# Supplementary material for: The Role of Adhesion in Triboelectrification Trends: Charge Polarity and Magnitude
Source: Research Square preprint supplement (doi:10.21203/rs.3.rs-8249486/v1), 2025-12-12
Supplement: Supplementary file 1 [file 4f080c0ba203ac978f4b8d74.docx]

**The Role of Adhesion in Triboelectrification Trends: Charge Polarity and Magnitude**

Līva Ģērmane1, Linards Lapčinskis1, Tianhuai Xu2, Jiahao Ye2, Jēkabs Grušs1, Jin-Chong Tan2*, Andris Šutka1*

1 Institute of Physics and Materials Science, Faculty of Natural Sciences and Technology, Riga Technical University, P. Valdena Street 3/7, Riga, LV-1048, Latvia

2 Multifunctional Materials & Composites (MMC) Laboratory, Department of Engineering Science, University of Oxford, Parks Road, Oxford, OX1 3PJ, UK


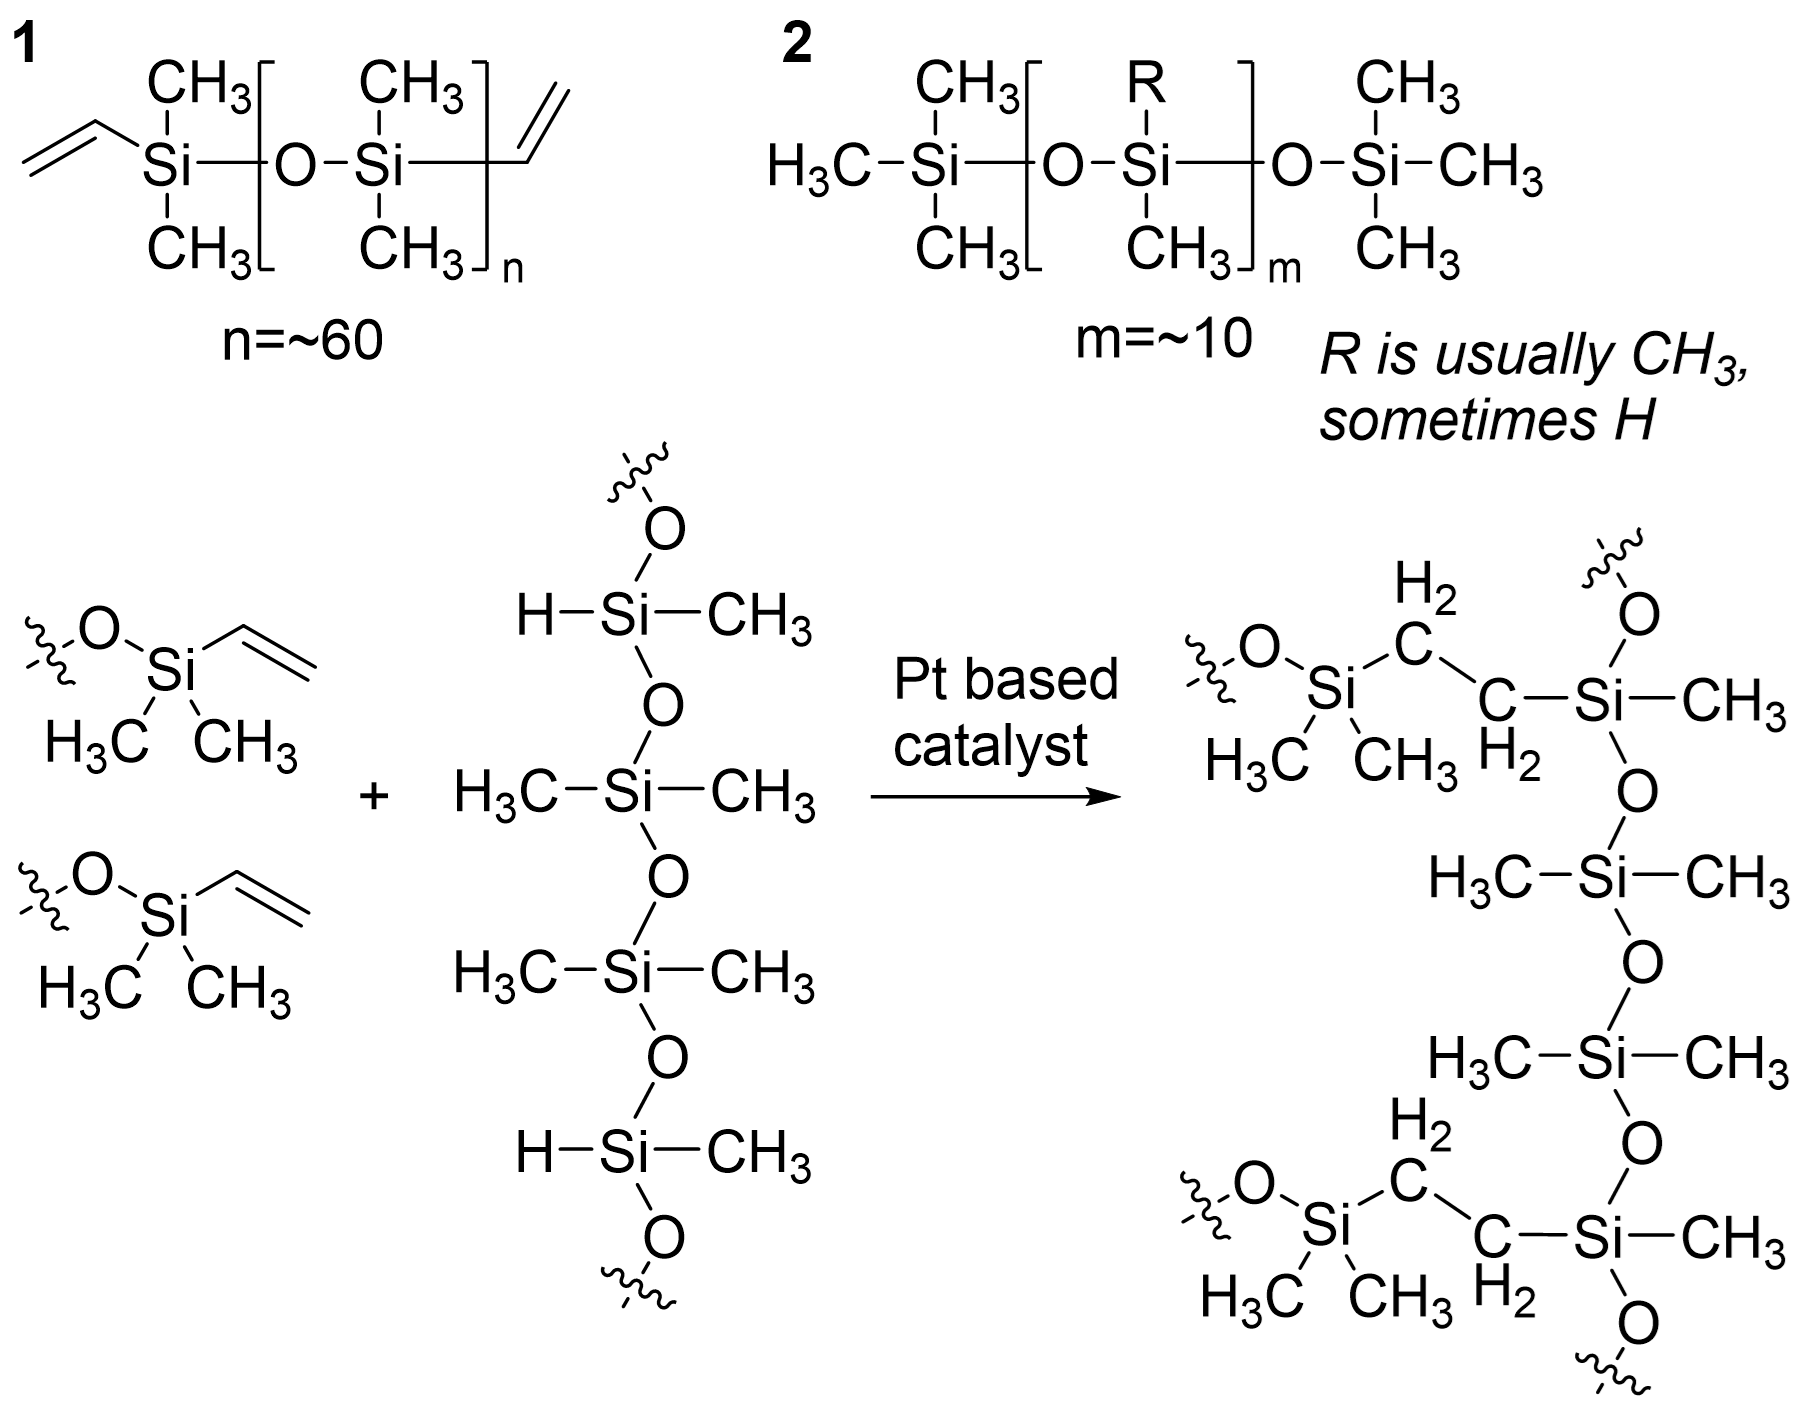


Scheme S1. PDMS crosslinking mechanism, where 1 is base prepolymer and 2 is curing agent.





Fig. S1. Example of separation force curves for various PDMS compositions.


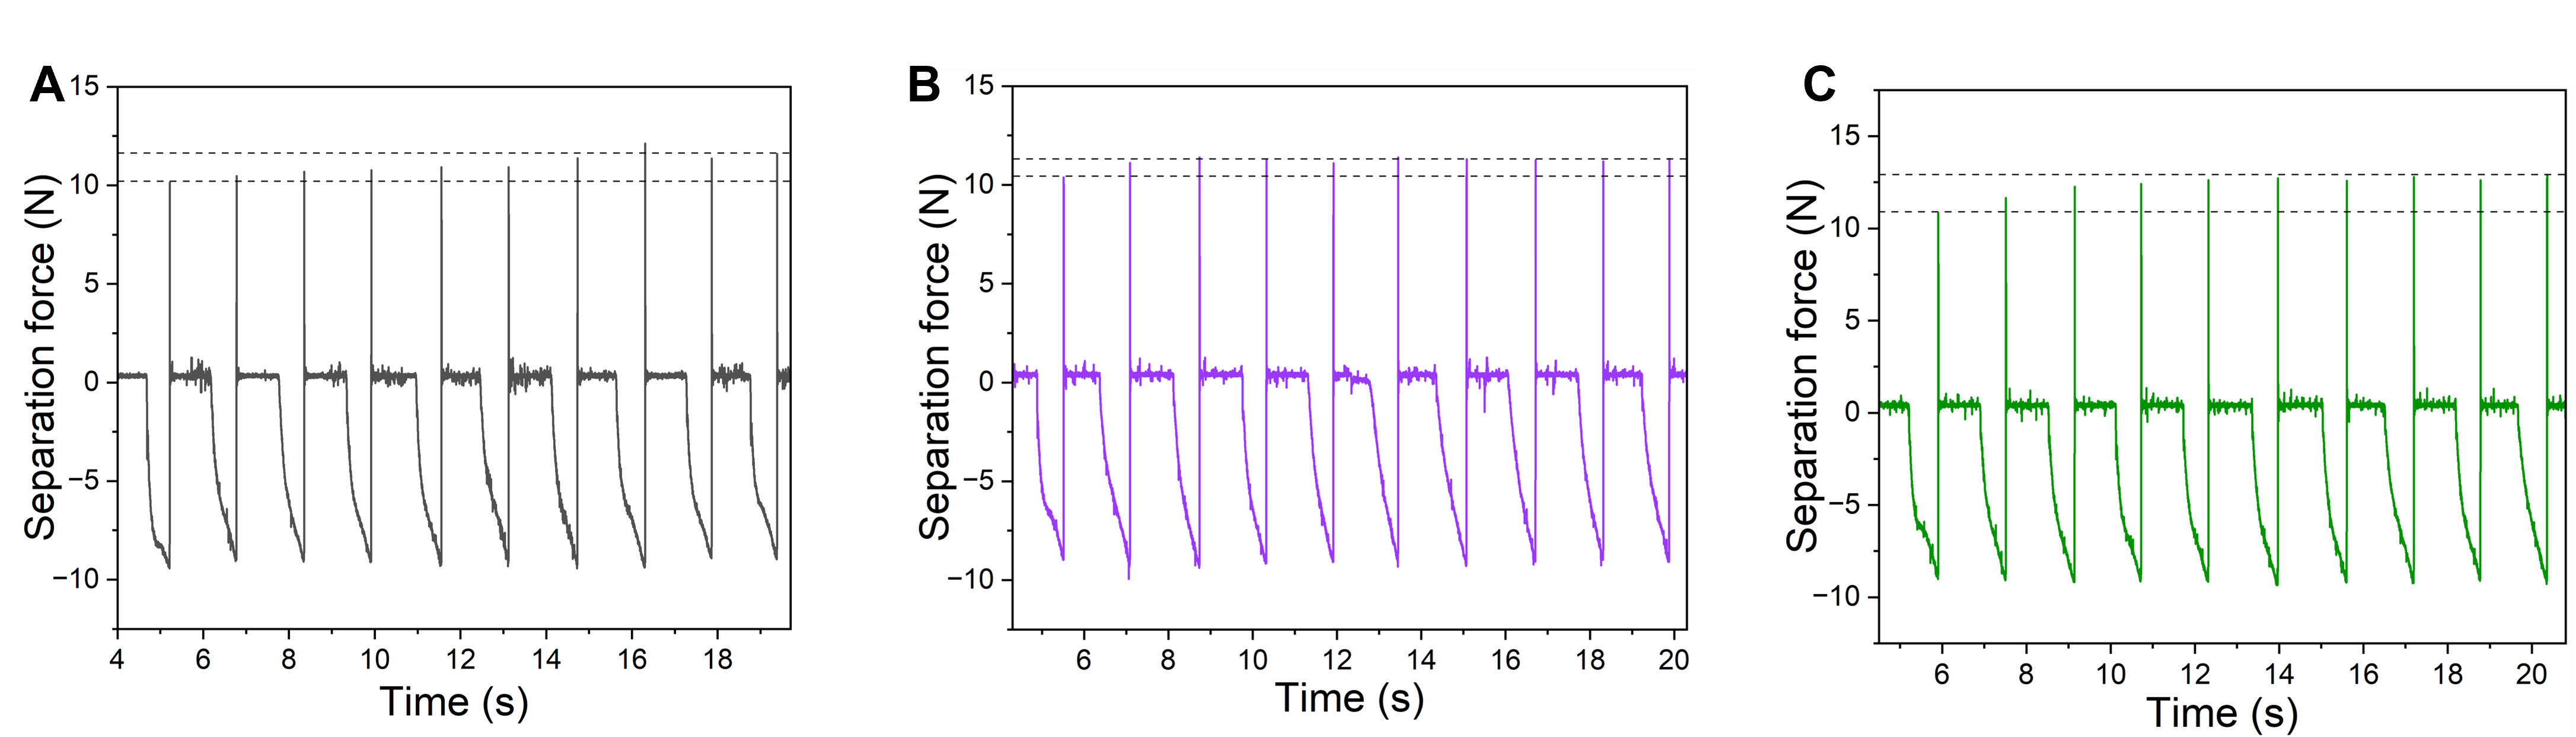


Fig. S2. First 10 separation force peaks for (A) 5:1, (B) 10:1 and (C) 15:1 PDMS compositions.
